# Supplementary material for: Immunization with Anaplasma centrale Msp2 HVRs Is Less Effective than the Live A. centrale Vaccine against Anaplasmosis
Source: MDPI journal article supplement (doi:10.3390/vaccines11101544), 2023-09-29
Supplement: s1 [file s1]

Supplemental Table 1: Identity matrix of Msp2 HVR sequences (aa)

|                             | Ac C | Ac G1 | Ac F | Ac B1 | Ac AF | Ac A1 | Ac A22 | V2    | V3    | V5    | V11   | V8    | V1    | V4    | V10   | V7    | V9    | V6    | Am E6/F7 | Am 1  | Am 2  | Am 9H1 | Am G11 |
|-----------------------------|------|-------|------|-------|-------|-------|--------|-------|-------|-------|-------|-------|-------|-------|-------|-------|-------|-------|----------|-------|-------|--------|--------|
| Ac C                        |      | 53    | 62   | 42    | 77    | 51    | 58     | 50    | 53    | 56    | 53    | 52    | 37    | 39    | 54    | 53    | 61    | 60    | 57       | 41    | 52    | 41     | 55     |
| Ac G1                       |      |       | 64   | 45    | 57    | 52    | 51     | 39    | 40    | 44    | 44    | 41    | 40    | 41    | 47    | 48    | 43    | 57    | 54       | 40    | 43    | 41     | 52     |
| Ac F                        |      |       |      | 50    | 50    | 50    | 45     | 43    | 46    | 49    | 48    | 48    | 47    | 49    | 48    | 47    | 49    | 43    | 48       | 39    | 48    | 45     | 46     |
| Ac B1                       |      |       |      |       | 46    | 49    | 46     | 52    | 55    | 48    | 53    | 48    | 52    | 53    | 44    | 46    | 49    | 43    | 41       | 72    | 51    | 41     | 46     |
| Ac AF                       |      |       |      |       |       | 52    | 50     | 38    | 38    | 44    | 45    | 41    | 31    | 33    | 40    | 40    | 42    | 49    | 50       | 47    | 45    | 38     | 44     |
| Ac A1                       |      |       |      |       |       |       | 55     | 33    | 37    | 41    | 37    | 34    | 28    | 30    | 44    | 43    | 39    | 40    | 44       | 52    | 34    | 31     | 43     |
| Ac A22                      |      |       |      |       |       |       |        | 48    | 48    | 47    | 48    | 47    | 38    | 39    | 36    | 36    | 42    | 41    | 40       | 54    | 47    | 34     | 39     |
| V2                          |      |       |      |       |       |       |        |       | 92    | 82    | 87    | 92    | 78    | 75    | 50    | 60    | 80    | 60    | 46       | 56    | 89    | 70     | 65     |
| V3                          |      |       |      |       |       |       |        |       |       | 91    | 84    | 84    | 78    | 75    | 54    | 64    | 87    | 68    | 50       | 58    | 81    | 71     | 72     |
| V5                          |      |       |      |       |       |       |        |       |       |       | 76    | 75    | 69    | 66    | 59    | 67    | 90    | 70    | 58       | 49    | 73    | 80     | 75     |
| V11                         |      |       |      |       |       |       |        |       |       |       |       | 95    | 68    | 64    | 48    | 53    | 71    | 58    | 44       | 55    | 98    | 59     | 63     |
| V8                          |      |       |      |       |       |       |        |       |       |       |       |       | 70    | 67    | 49    | 56    | 72    | 59    | 45       | 52    | 97    | 62     | 64     |
| V1                          |      |       |      |       |       |       |        |       |       |       |       |       |       | 97    | 46    | 56    | 66    | 46    | 42       | 56    | 67    | 88     | 51     |
| V4                          |      |       |      |       |       |       |        |       |       |       |       |       |       |       | 49    | 59    | 69    | 48    | 44       | 53    | 63    | 85     | 54     |
| V10                         |      |       |      |       |       |       |        |       |       |       |       |       |       |       |       | 91    | 64    | 49    | 89       | 44    | 47    | 52     | 57     |
| V7                          |      |       |      |       |       |       |        |       |       |       |       |       |       |       |       |       | 74    | 54    | 80       | 45    | 52    | 61     | 62     |
| V9                          |      |       |      |       |       |       |        |       |       |       |       |       |       |       |       |       |       | 77    | 52       | 43    | 68    | 69     | 85     |
| V6                          |      |       |      |       |       |       |        |       |       |       |       |       |       |       |       |       |       |       | 54       | 37    | 56    | 50     | 92     |
| Am E6/F7                    |      |       |      |       |       |       |        |       |       |       |       |       |       |       |       |       |       |       |          | 40    | 43    | 51     | 46     |
| Am 1                        |      |       |      |       |       |       |        |       |       |       |       |       |       |       |       |       |       |       |          |       | 55    | 45     | 42     |
| Am 2                        |      |       |      |       |       |       |        |       |       |       |       |       |       |       |       |       |       |       |          |       |       | 59     | 61     |
| Am 9H1                      |      |       |      |       |       |       |        |       |       |       |       |       |       |       |       |       |       |       |          |       |       |        | 55     |
| Am G11                      |      |       |      |       |       |       |        |       |       |       |       |       |       |       |       |       |       |       |          |       |       |        |        |
| Range of identity to Ac HVR |      |       |      |       |       |       |        | 33-50 | 37-55 | 41-56 | 37-53 | 34-52 | 28-52 | 30-53 | 36-54 | 36-53 | 39-61 | 40-60 | 40-57    | 39-72 | 34-52 | 31-45  | 39-55  |
